# Supplementary material for: Identification of a haem domain in human soluble adenylate cyclase
Source: PubMed Central journal article supplement — Biosci Rep. 2012 Aug 8;32(Pt 5):491–9. doi: 10.1042/BSR20120051 (PMC3475452; doi:10.1042/bsr20120051), 2012-08-08
Supplement: bsr0320491add.pdf [file bsr0320491add.pdf]

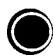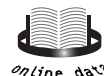

## SUPPLEMENTARY ONLINE DATA

## Identification of a haem domain in human soluble adenylate cyclase

Sabine MIDDELHAUFE\*†, Martina LEIPELT\*, Lonny R. LEVIN‡, Jochen BUCK‡ and Clemens STEEGBORN\*§<sup>1</sup>

\*Department of Physiological Chemistry, Ruhr-University Bochum, Bochum, Germany, †Biosciences, College of Life and Environmental Sciences, University of Exeter, Exeter, U.K., ‡Department of Pharmacology, Weill Medical College of Cornell University, New York, NY, U.S.A., and §Department of Biochemistry, University of Bayreuth, Bayreuth, Germany

**Table S1 Expression constructs for fragments of the human sAC regulatory region fused to GST**

| Construct (N-terminus→C-terminus) | Expression | Solubility |
|-----------------------------------|------------|------------|
| 485–760                           | –          | n.a.       |
| 580–760                           | +          | –          |
| 870–1091                          | +          | –          |
| 897–1081                          | +          | +          |
| 897–1130                          | +          | +          |
| 965–1130                          | +          | +          |
| 1030–1200                         | +          | –          |
| 1444–1608                         | +          | –          |

**Received 31 May 2012/18 June 2012; accepted 19 June 2012****Published as Immediate Publication 10 July 2012, doi 10.1042/BSR20120051**<sup>1</sup> To whom correspondence should be addressed (email Clemens.Steegborn@uni-bayreuth.de).
